# Supplementary material for: Antibiotic removal by metal–organic framework and 2D nanomaterial based polyetherimide mixed matrix membranes using a membrane bioreactor
Source: Royal Society of Chemistry journal article supplement (doi:10.1039/d2ew00620k), 2022-10-25
Supplement: d2ew00620k1.pdf [file d2ew00620k1.pdf]

**Supporting Information**  
**for**  
**Antibiotics removal using membrane bioreactor by metal-organic framework**  
**and 2D nanomaterials based polyetherimide mixed matrix membranes**

Amol Vijay Sonawane and Z.V.P. Murthy\*

Department of Chemical Engineering,

Sardar Vallabhbhai National Institute of Technology, Surat-395007, Gujarat, India.

---

\*Corresponding author: E-mail: [zvpm2000@yahoo.com](mailto:zvpm2000@yahoo.com); [zvpm@ched.svnit.ac.in](mailto:zvpm@ched.svnit.ac.in)

E-mail: [sonawaneamol38@gmail.com](mailto:sonawaneamol38@gmail.com) (Amol Vijay Sonawane)

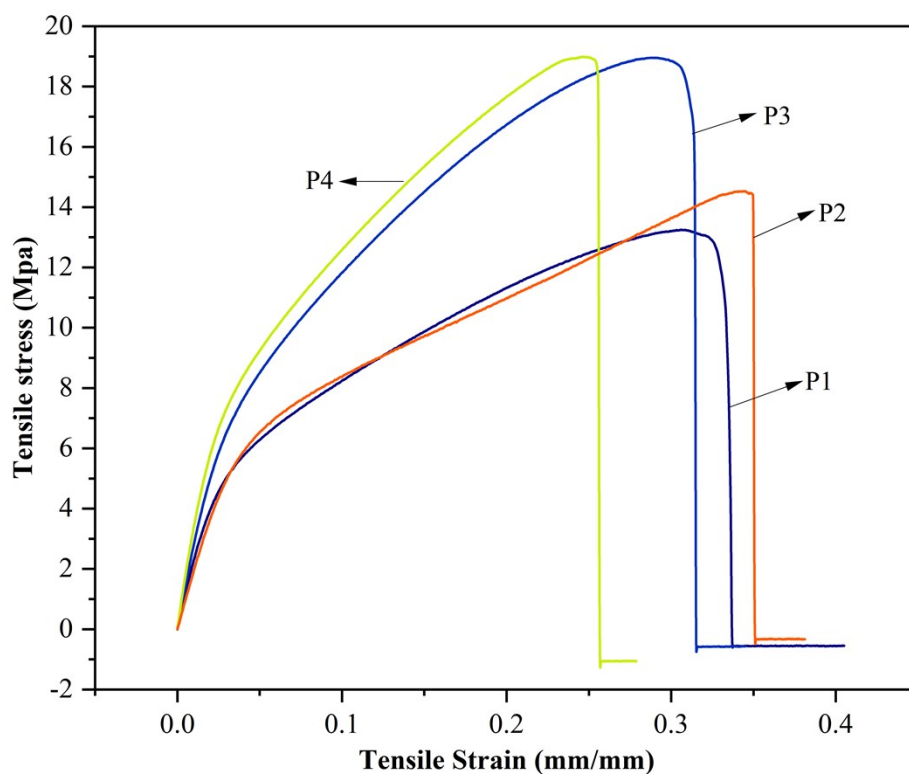

Fig. S1. Tensile strength curves of pure PEI and PEI based MMMs.

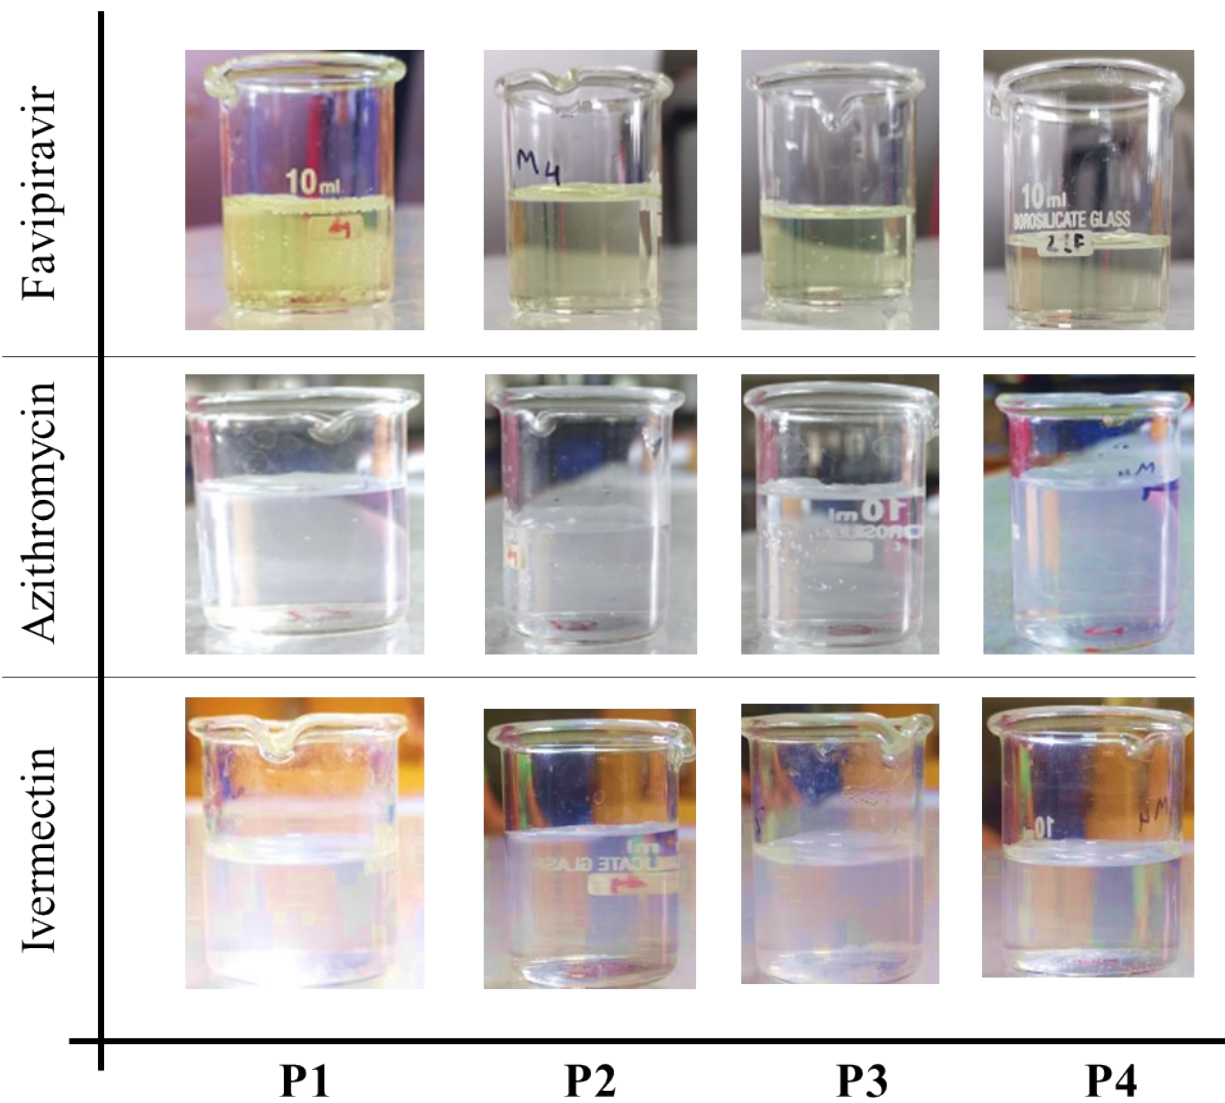

Fig. S2. Favipiravir, Azithromycin and Ivermectin removal shown for membranes using anecdotic beakers.

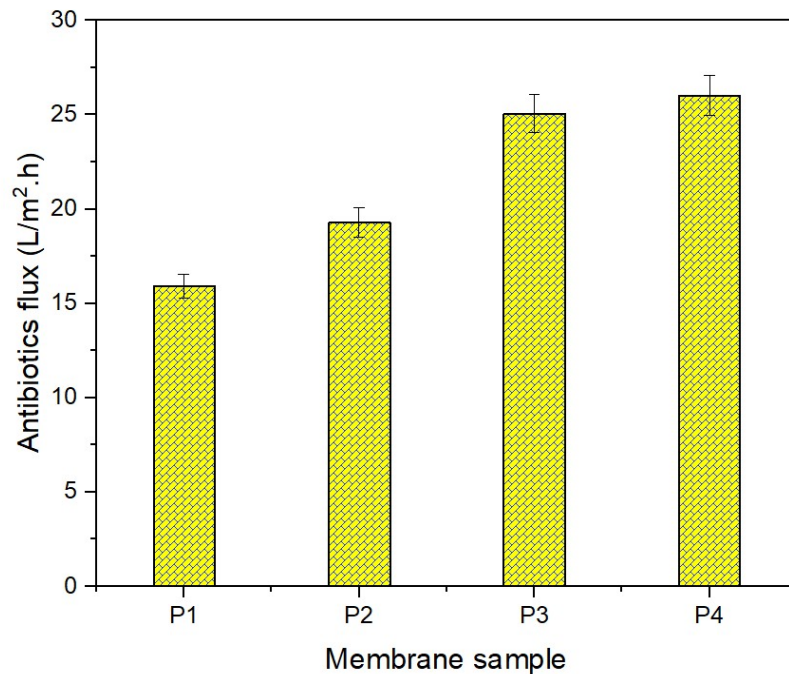

Fig. S3. The antibiotics wastewater flux through pure PEI and PEI based MMMs.

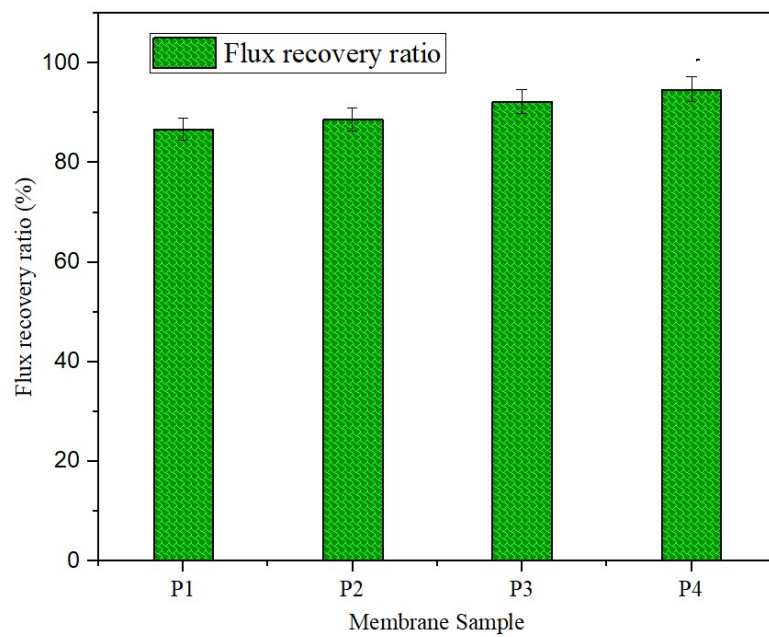

Fig. S4. The flux recovery ratio of the pure PEI and MMMs.

Table ST1. Mechanical properties of the PEI-based MMMs.

| Membrane type | Breaking strength (MPa) | Elongation-at-break (%) |
|---------------|-------------------------|-------------------------|
| P1            | 13.25                   | 4.90                    |
| P2            | 14.53                   | 5.78                    |
| P3            | 18.96                   | 6.12                    |
| P4            | 18.99                   | 6.90                    |
